# Supplementary material for: The Durability of EUS-Guided Chemoablation of Mucinous Pancreatic Cysts: A Long-Term Follow-Up of the CHARM trial
Source: PubMed Central journal article supplement — Clin Gastroenterol Hepatol. Author manuscript; Available in PMC 2022 Feb 1. (PMC8530455; doi:10.1016/j.cgh.2021.03.041), 2021-04-01
Supplement: NIHMS1736026-supplement-1.pdf [file NIHMS1736026-supplement-1.pdf]

**Supplementary Table 1.** Baseline Demographics and Cyst Characteristics (N = 36)

|                                            |                        |
|--------------------------------------------|------------------------|
| Female, n (%)                              | 22 (61.1)              |
| Mean age (SD, range), y                    | 70.0 (10.4; 45.0–83.0) |
| Mean maximal cyst diameter (SD, range), mm | 27.6 (7.5; 15.5–49.0)  |
| Mean cyst volume (SD, range), mL           | 10.5 (9.4; 1.9–38.8)   |
| Cyst location, n (%)                       |                        |
| Head                                       | 17 (47.2)              |
| Body                                       | 16 (44.4)              |
| Tail                                       | 1 (2.8)                |
| Neck                                       | 2 (5.6)                |
| Presumed diagnosis, n (%)                  |                        |
| MCN                                        | 8 (22.2)               |
| IPMN                                       | 25 (69.4)              |
| Indeterminate                              | 3 (8.3)                |
| Multilocular, n (%)                        | 9 (25.0)               |

IPMN, intraductal papillary mucinous neoplasms; MCN, mucinous cystic neoplasms; SD, standard deviation.

**Supplementary Table 2.** Treatment Response at 12 Months Postablation Versus Treatment Response at Long-Term Follow-Up Imaging

|                           | 12 months postablation | Long-term follow-up |
|---------------------------|------------------------|---------------------|
| Treatment response, n (%) |                        |                     |
| Complete response         | 23 (63.9)              | 24 (66.7)           |
| Partial response          | 7 (19.4)               | 8 (22.2)            |
| Nonresponse               | 6 (16.7)               | 4 (11.1)            |
